# Supplementary material for: Identification of Lactic Acid Bacteria Strains Isolated from Sourdoughs Prepared with Different Flour Types
Source: MDPI journal article supplement (doi:10.3390/app14052093), 2024-03-02
Supplement: s1 [file s1]

## Supplementary file to:

# Identification of Lactic Acid Bacteria Strains Isolated from Sourdoughs Prepared with Different Flour Types

Zoltan Urshev <sup>1</sup>, Dilyana Doynova <sup>1</sup>, Ivan Prasev <sup>2</sup>, Rositsa Denkova-Kostova <sup>3,\*</sup>, Anna Koleva <sup>2</sup>, Zapryana Denkova <sup>4</sup>, Bogdan Goranov <sup>4</sup> and Georgi Kostov <sup>5</sup>

<sup>1</sup> LB Bulgaricum, Bulgaria, zoltan.urshev@lbbulgaricum.bg

<sup>2</sup> Department "Technology of grain, fodder, bakery and confectionery products", University of Food Technologies, 26 Maritza boulevard, 4002, Plovdiv, Bulgaria; a\_koleva@uft-plovdiv.bg; iv\_pr@abv.bg

<sup>3</sup> Department "Biochemistry and molecular biology", University of Food Technologies, 26 Maritza boulevard, 4002, Plovdiv, Bulgaria; rositsa\_denkova@uft-plovdiv.bg

<sup>4</sup> Department "Microbiology", University of Food Technologies, 26 Maritza boulevard, 4002, Plovdiv, Bulgaria; b\_goranov@uft-plovdiv.bg; z\_denkova@uft-plovdiv.bg

<sup>5</sup> Department "Technology of wine and beer", University of Food Technologies, 26 Maritza boulevard, 4002, Plovdiv, Bulgaria; g\_kostov@uft-plovdiv.bg

\* Correspondence: rositsa\_denkova@uft-plovdiv.bg

### Contents:

**Table S1.** Cell morphology of the obtained isolates grown on MRS-agar.

**Table S2.** Most discriminative carbohydrate utilization patterns of the tested isolates

**Figure S1.** Restriction profiles of 16S-ribosomal DNA of the studied isolates treated with the restriction enzyme *HaeIII*.

**Table S3.** Hits from the NCBI database with  $\geq 99\%$  similarity to the partial 16S-rDNA sequences of the studied isolates

**Figure S2.** Phylogenetic tree of the most common *Lactobacillus* species found in sourdough

**Table S1.** Cell morphology of the obtained isolates grown on MRS-agar. Observations were performed after methylene blue staining, magnification 1000 x.

|                              |                                    |
|------------------------------|------------------------------------|
| Ech1 – short/medium rods     | X1 - cocci                         |
| Ech2 – short/medium rods     | X2 – medium/single long rods       |
| Ech3 – short/medium rods     | X4 – short/medium/single long rods |
| Ech4 – short/medium rods     | L1- short/medium rods              |
| Ech6 - short rods/volutine   | L2- short/medium/single long rods  |
| Ech7 - short rods            | El1 - short rods/volutine          |
| Ph1 – short/medium/long rods | El2 - cocci                        |
| Ph2 - short rods             | Ch42 - cocci                       |
| Ph3 – medium/long rods       | Ch53 - slightly elongated cocci    |
| Ph5 – short/single long rods | Ch54 - slightly elongated cocci    |
| Ph4 - medium rods            | Car - short rods/volutin           |
| Cn1 – short/medium rods      |                                    |
| Cn2 - short rods             |                                    |
| Cn3 - short rods             |                                    |
| Cn4 - short rods             |                                    |
| Cn5 - short rods/volutine    |                                    |
| Cn6 - short rods X1 – cocci  |                                    |

**Table S2.** Most discriminative carbohydrate utilization patterns of the tested isolates\*

| Isolate       | Ech1 | Ech3 | L1 | L2 | X2 | X4 | El1 | Cn1 | Ph1 | Ph2 | Ph3 | Ph5 | Car |
|---------------|------|------|----|----|----|----|-----|-----|-----|-----|-----|-----|-----|
| L-arabinose   | +    | -    | +  | +  | +  | +  | +   | +   | +   | -   | -   | -   | +   |
| D-xylose      | -    | +    | -  | +  | +  | +  | +   | -   | +   | -   | -   | -   | +   |
| Galactose     | +    | -    | +  | -  | -  | -  | -   | +   | -   | +   | +   | +   | -   |
| b-mannose     | +    | -    | +  | -  | -  | -  | -   | +   | -   | +   | +   | +   | -   |
| Rhamnose      | -    | -    | +  | -  | -  | -  | -   | -   | -   | +   | +   | -   | -   |
| Mannitol      | +    | -    | +  | -  | -  | -  | -   | +   | -   | +   | +   | +   | -   |
| Sorbitol      | +    | -    | +  | -  | -  | -  | -   | +   | -   | +   | +   | +   | -   |
| Amygdaline    | +    | -    | +  | -  | -  | -  | -   | +   | -   | +   | +   | +   | -   |
| Arbutine      | +    | -    | +  | -  | -  | -  | -   | +   | -   | +   | +   | +   | -   |
| Esculine      | +    | -    | +  | -  | -  | -  | -   | +   | -   | -   | +   | +   | -   |
| Salicine      | +    | -    | +  | -  | -  | -  | -   | +   | -   | +   | +   | +   | -   |
| Cellobiose    | +    | -    | +  | +  | -  | -  | -   | +   | -   | +   | +   | +   | -   |
| Lactose       | +    | -    | +  | -  | -  | -  | -   | +   | -   | +   | +   | +   | -   |
| Melibiose     | +    | w    | +  | +  | -  | w  | -   | +   | -   | +   | +   | +   | w   |
| Saccharose    | +    | -    | +  | -  | -  | -  | -   | +   | -   | +   | +   | +   | -   |
| Trehalose     | +    | -    | +  | -  | -  | -  | -   | +   | -   | +   | +   | +   | -   |
| Melezitose    | +    | -    | +  | -  | -  | -  | -   | +   | -   | -   | -   | -   | -   |
| D-raffinose   | +    | -    | +  | -  | -  | -  | -   | +   | -   | -   | +   | -   | -   |
| B-gentiobiose | +    | -    | +  | -  | -  | -  | -   | +   | -   | +   | +   | +   | -   |
| D-turanose    | +    | -    | +  | -  | -  | -  | -   | +   | -   | +   | -   | -   | -   |

\*All tested strains were positive for ribose, D-glucose, D-fructose, N-acetyl-glucosamine and maltose; w- weak

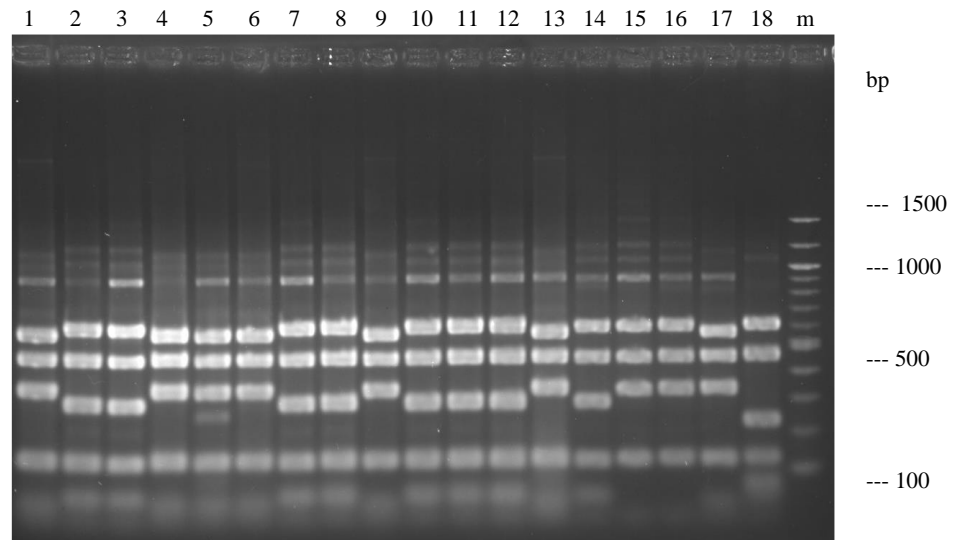

**Figure S1.** Restriction profiles of 16S-ribosomal DNA of the studied isolates treated with the restriction enzyme *Hae*III. Lanes-isolate: 1-Ech1; 2- Ech3; 3 – Ph1; 4 - Ph2; 5 – Ph3; 6 – Ph5; 7 – X2; 8 – X4; 9 – L1; 10 – L2; 11 – El1; 12 – Car; 13 – Cn1; 14 - *Levilactobacillus brevis* LMG 6906; 15 – *Lacticaseibacillus rhamnosus* LMG 6400; 16 – *Lacticaseibacillus paracasei* LMG 13087; 17 - *Lactiplantibacillus plantarum* DSM 20174; 18 – *Limosilactobacillus fermentum* DSM 20052; m – 100-bp DNA ladder.

**Table S3.** Hits from the NCBI database with  $\geq 99\%$  similarity to the partial 16S-rDNA sequences of the studied isolates. The number of base pairs (bp) of the partial 16S rDNA sequence read for each isolate is shown in parentheses.

| Isolate        | Species/subspecies                                             | Number of hits |
|----------------|----------------------------------------------------------------|----------------|
| Ech1 (1426 bp) | <i>Lactiplantibacillus</i>                                     | 101            |
|                | . <i>Lactiplantibacillus plantarum</i>                         | 56             |
|                | . <i>Lactiplantibacillus argentoratensis</i>                   | 44             |
|                | . <i>Lactiplantibacillus</i> sp.                               | 1              |
| Ech3 (1410 bp) | <i>Levilactobacillus</i>                                       | 101            |
|                | . <i>Levilactobacillus brevis</i>                              | 100            |
|                | . <i>Levilactobacillus</i> sp.                                 | 1              |
| L1 (1399 bp)   | <i>Lactiplantibacillus</i>                                     | 100            |
|                | . <i>Lactiplantibacillus plantarum</i>                         | 69             |
|                | . <i>Lactiplantibacillus argentoratensis</i>                   | 30             |
|                | . <i>Lactiplantibacillus</i> sp.                               | 1              |
| L2 (1403 bp)   | <i>Levilactobacillus</i>                                       | 100            |
|                | . <i>Levilactobacillus brevis</i>                              | 99             |
|                | . <i>Levilactobacillus</i> sp.                                 | 1              |
| El1 (1397 bp)  | <i>Levilactobacillus</i>                                       | 100            |
|                | . <i>Levilactobacillus brevis</i>                              | 99             |
|                | . <i>Levilactobacillus</i> sp.                                 | 1              |
| X2 (1415 bp)   | <i>Levilactobacillus</i>                                       | 105            |
|                | . <i>Levilactobacillus brevis</i>                              | 104            |
|                | . <i>Levilactobacillus brevis</i> BSO 464                      | 1              |
|                | . <i>Lactobacillus</i> sp.                                     | 1              |
| X4 (1405 bp)   | <i>Levilactobacillus</i>                                       | 100            |
|                | . <i>Levilactobacillus brevis</i>                              | 99             |
|                | . <i>Levilactobacillus</i> sp.                                 | 1              |
| Cn1 (1395 bp)  | <i>Lactiplantibacillus</i>                                     | 101            |
|                | . <i>Lactiplantibacillus plantarum</i>                         | 50             |
|                | . <i>Lactiplantibacillus argentoratensis</i>                   | 51             |
| Ph1 (1417 bp)  | <i>Levilactobacillus</i>                                       | 101            |
|                | . <i>Levilactobacillus brevis</i>                              | 100            |
|                | . <i>Levilactobacillus</i> sp.                                 | 1              |
| Ph2 (1431 bp)  | <i>Lactiplantibacillus</i>                                     | 100            |
|                | . <i>Lactiplantibacillus pentosus</i>                          | 44             |
|                | . <i>Lactiplantibacillus plantarum</i>                         | 54             |
|                | . <i>Lactiplantibacillus argentoratensis</i>                   | 2              |
| Ph3 (1399 bp)  | <i>Lactiplantibacillus</i>                                     | 102            |
|                | . <i>Lactiplantibacillus plantarum</i>                         | 61             |
|                | . <i>Lactiplantibacillus pentosus</i>                          | 35             |
|                | . <i>Lactiplantibacillus plantarum</i> subsp. <i>plantarum</i> | 1              |
| Ph5 (1412 bp)  | <i>Lactiplantibacillus</i>                                     | 102            |
|                | . <i>Lactiplantibacillus plantarum</i>                         | 65             |
|                | . <i>Lactiplantibacillus pentosus</i>                          | 29             |
|                | . <i>Lactiplantibacillus argentoratensis</i>                   | 1              |
| Car (1418 bp)  | <i>Levilactobacillus</i>                                       | 101            |
|                | . <i>Levilactobacillus brevis</i>                              | 100            |
|                | . <i>Levilactobacillus</i> sp.                                 | 1              |

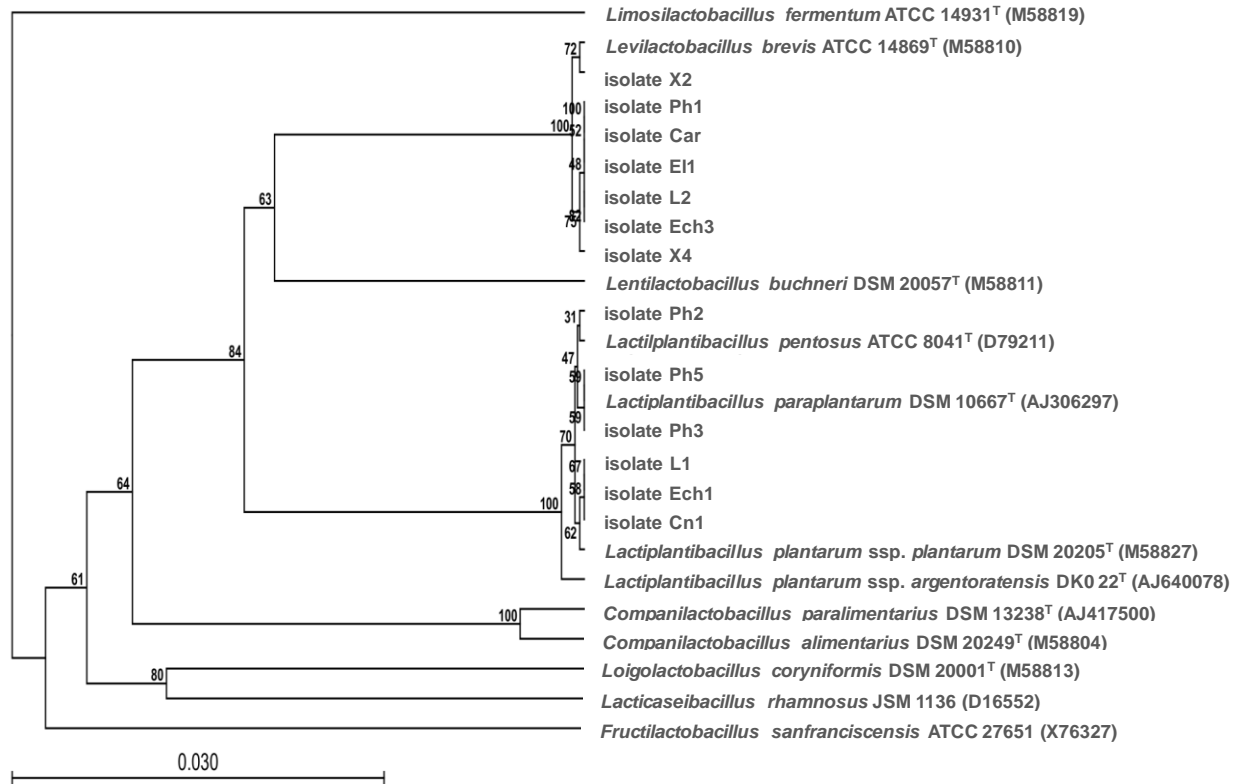

**Figure S2.** Phylogenetic tree of the most common *Lactobacillus* species found in sourdough and the isolates obtained in this study based on ca. 1356 bp partial sequence of the 16S rRNA gene. The tree was generated by the CLC Sequence Viewer software ver. 6.6.1 ([www.clcbio.com](http://www.clcbio.com), CLC bio A/S) by the UPGMA algorithm. Bootstrap values displayed at nodes were obtained based on 100 replicates. Sequences were derived from GenBank (NCBI). Type strains are labeled with superscript “T”.
